RESEARCH ARTICLE

# A wireless soil moisture sensor powered by solar energy

Mingliang Jiang<sup>1,2,3</sup>, Mouchao Lv<sup>1,2,3\*</sup>, Zhong Deng<sup>1,2,3</sup>, Guoliang Zhai<sup>1,2,3</sup>

**1** Farmland Irrigation Research Institute, Chinese Academy of Agricultural Sciences, Muye District, Xinxiang City Henan province, China, **2** Key Laboratory of Water-Saving Agriculture of Henan Province, Muye District, Xinxiang City Henan province, China, **3** Center for Efficient Irrigation Engineering and Technology Research, CAAS, Muye District, Xinxiang City Henan province, China

\* [13937381585@163.com](mailto:13937381585@163.com)

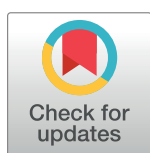

## Abstract

In a variety of agricultural activities, such as irrigation scheduling and nutrient management, soil water content is regarded as an essential parameter. Either power supply or long-distance cable is hardly available within field scale. For the necessity of monitoring soil water dynamics at field scale, this study presents a wireless soil moisture sensor based on the impedance transform of the frequency domain. The sensor system is powered by solar energy, and the data can be instantly transmitted by wireless communication. The sensor electrodes are embedded into the bottom of a supporting rod so that the sensor can measure soil water contents at different depths. An optimal design with time executing sequence is considered to reduce the energy consumption. The experimental results showed that the sensor is a promising tool for monitoring moisture in large-scale farmland using solar power and wireless communication.

## OPEN ACCESS

**Citation:** Jiang M, Lv M, Deng Z, Zhai G (2017) A wireless soil moisture sensor powered by solar energy. PLoS ONE 12(9): e0184125. <https://doi.org/10.1371/journal.pone.0184125>

**Editor:** Mauro Villarini, Università degli Studi della Tuscia, ITALY

**Received:** December 15, 2016

**Accepted:** August 18, 2017

**Published:** September 8, 2017

**Copyright:** © 2017 Jiang et al. This is an open access article distributed under the terms of the [Creative Commons Attribution License](https://creativecommons.org/licenses/by/4.0/), which permits unrestricted use, distribution, and reproduction in any medium, provided the original author and source are credited.

**Data Availability Statement:** All relevant data are within the paper and its Supporting Information files.

**Funding:** This work was supported by Central Public-interest Scientific Institution Basal Research Fund (Farmland Irrigation Research Institute, CAAS) (FIRI2016-25), <http://www.firi.org.cn/>; Science and Technology Innovation Project of The Chinese Academy of Agricultural Sciences, <http://www.caas.net.cn/>. The funders had no role in study design, data collection and analysis, decision to publish, or preparation of the manuscript.

## 1. Introduction

Soil water content plays an important role in governing crop growth and yield. The serious water shortage in Northern China requires a more efficient way of agricultural water resources development. In recent years, the soil-based water measurements is used in a various devices [1–4]. These techniques provide farmers with information about the most appropriate volumes of irrigation to apply in each phenological period of the crop. There is a wide range of electrically based soil moisture measurement techniques established in the fields of geophysical surveying [5–6] and agronomy [7–9]. These include resistivity based methods [10–11]; capacitance based methods such as Frequency Domain Reflectometry (FDR) [12]; Time Domain Reflectometry (TDR) [13]; as well as Radiation based techniques [14]. Although low cost implementations of resistive based sensors have been suggested in the past [15–16], commercial implementations of these devices (for example the Landmapper<sup>®</sup>, that include interpretation software for vertical electrical properties of the soil) are expensive (typically \$500–\$1600), lack integrated data-logging capabilities, or are simply unavailable. Nowadays, with the rapid development of information and communication technology, Wireless Sensor Network (WSNs), as a new information acquisition and processing technology, has been widely used in real life [17–18].

**Competing interests:** The authors have declared that no competing interests exist.

To monitor soil water content dynamically in the farmland, a sensor technique, which has high accuracy and rapid response, low energy consumption and cost, is desired [19–20]. In early times, techniques for this purpose were a plaster sensor and tensiometer, but their response was unsatisfactory and there was hysteresis error between wetting and drying [21]. Since Topp [22] presented a three-order polynomial equation to approximate the relationship between the volumetric soil water content (VSWC) and relative dielectric constant of moist soil, many kinds of dielectric sensors based on TDR and FDR principles have been developed [23–26]. TDR sensors take a number of seconds to complete a water content measurement [27]. A more rapid response can be achieved by FD sensor, which only needs a fraction of a second [28]. However, there still have two technique limitations: 1) Underground power supply cables are impractical under large farmland areas, and the life of batteries is limited. The energy consumption, environmental and human labor costs required to change batteries regularly for a soil moisture sensor network to be used in an irrigation system are prohibitive. Providing a stable and lasting energy supplement for sensors by solar power must be considered. 2) Because the sensor output signals transmitted by long-distance cables are unrealistic in a farmland environment [29], so another limitation is to wirelessly transfer the data with data-loggers or routers across a certain distance.

In this study, we developed a soil moisture sensor that does not require external cables but rather uses a solar battery for power supply and a wireless transceiver module for data transmission, and then a field evaluation was conducted. The manuscript includes, firstly, the description of the electrical methods that are used to determine soil water content for sensor system. Moreover, the description experiments to illustrate the calibration equation of water content sensor in the designed sensor system. Subsequently, the obtained results in the cited experiments are discussed. Finally, some conclusions about the experiments and the possibilities of the employment of this device for irrigation management are added.

## 2. Materials and methods

### 2.1 General description of the designed system

Fig 1 schematically shows the designed system, which including a solar panel (multi-crystalline silicon, diameter 170mm), a supporting rod (stainless steel, diameter 10mm, length 600mm), a soil water content sensor and a wireless communication module (nRF905, Nordic, Norway). Besides, a micro-controller (MSP430F149) together with an extended memory chip (FLASH, 1MB) used as a data-logger. Different sources of energy exist in different forms (e.g. light, vibration, and electromagnetic waves). These sources can be harvested and used to extend battery life of a sensor node [30]. To avoid the data loss in wireless transmission owing to occasional accidents, the data was also saved as back up in the memory chip. A major feature of this configuration was to allow for simple setting at a range of depth (100–500mm) and replacement in the field. The two electrodes of the sensor were embedded in the end of the supporting rod to measure the soil moisture. To make the sensor easily accessible in the soil, one of the electrodes has a conical shape, and the other electrode is annular, with a PVC insulation isolation ring between the two electrodes. The supporting rod is a hollow structure and contains a coaxial cable connecting the two electrodes. The soil moisture sensor circuit, information acquisition unit and wireless transceiver module are protected inside a plastic shield to avoid water and dust under farmland. To provide electric power, 4 batteries (Ni-MH, AA 1.5V, 2000mAh), recharged by solar energy, were used in series. The soil moisture sensor system can cost less than 57 USDs including solar power system, supporting rod (stainless steel), Frequency Domain probes, LP2981 level converter, electronic interfaces and MSP430F149

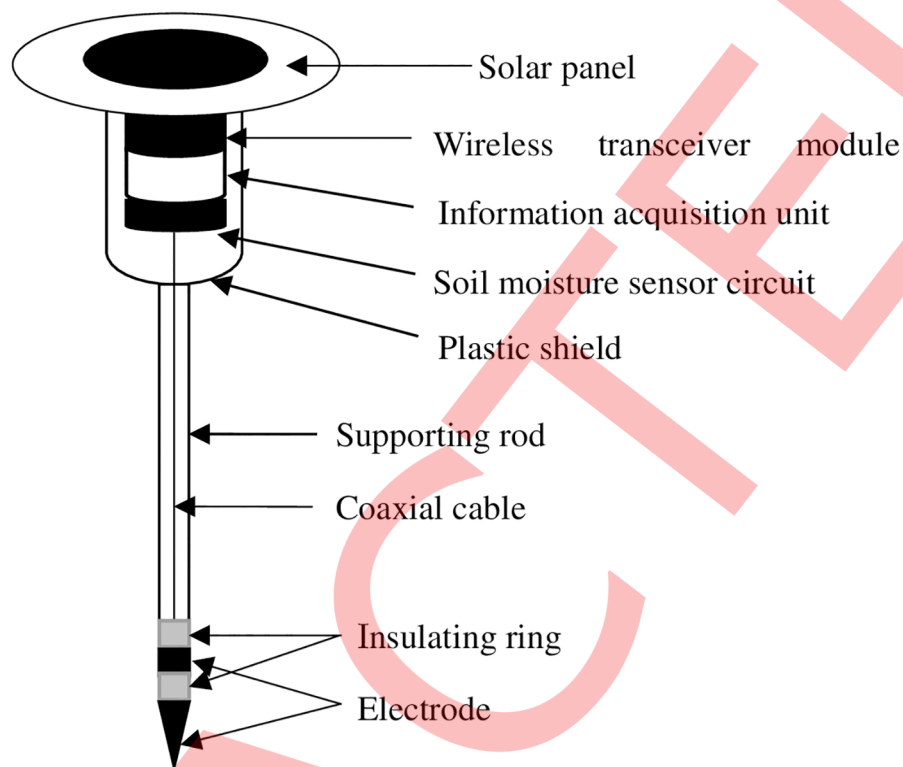

**Fig 1. Layout of solar-powered wireless sensor.**

<https://doi.org/10.1371/journal.pone.0184125.g001>

microcontroller. Table 1 summarizes the cost details of the soil moisture sensor system in this study.

As shown in Table 2, represented by any single model from different companies, some existing soil moisture sensors are listed and compared with the new sensor system in this study from view of cost and wireless network application. Featuring low-cost, energy efficiency and ease-of-use, for the most common sensors shown in Table 2, the new sensor system in this study show advantages over the other sensors.

Table 3 summarizes the power consumption of each component. Because the operating current of the micro-controller was considerably lower (0.01mA), it was reasonably disregarded when compared to the power consumption of other components. To ensure that the system has the smallest power consumption, the sensor could be switched from operating mode to stand-by mode at different intervals, as required. In the stand-by mode, the soil moisture sensor, information acquisition unit and wireless transmission module have a power

**Table 1. Cost details of system.**

| Items                       | Number | Price/USDs |
|-----------------------------|--------|------------|
| Solar power system          | 1      | 15         |
| Sensor circuit              | 1      | 10         |
| Supporting rod              | 1      | 8          |
| FD probe                    | 2      | 4          |
| Wireless transceiver module | 1      | 20         |
| Total                       | 6      | 57         |

<https://doi.org/10.1371/journal.pone.0184125.t001>

Table 2. Comparison with other existing sensors.

|                        | Tektronix TDR     | TDR100                         | Acclima TDT                        | CS 616      | ECH2O                                           | New sensor                      |
|------------------------|-------------------|--------------------------------|------------------------------------|-------------|-------------------------------------------------|---------------------------------|
| Principle of operation | TDR               | TDR                            | TDT                                | TLO         | Capacitance                                     | FDR                             |
| Sensor cost/ USDs      | 11700             | 3710                           | 350                                | 150         | 100                                             | 57                              |
| Equipment required     | analysis software | data logger, analysis software | custom controller, custom software | data logger | data logger, custom controller, custom software | data logger, custom controller, |

<https://doi.org/10.1371/journal.pone.0184125.t002>

consumption of approximately zero. Activation is achieved by timing activation and random activation, and the interval of timing activation can be changed through the parameter settings. For example, during rainfall time, soil moisture changes rapidly, and the interval of timing activation can be reduced appropriately. Solar power cannot guarantee real-time charging during rainfall and creates a discrepancy between energy supply and demand. The solution to this problem is to gradually extend the activation interval once the MCU detects soil moisture close to the saturation point to ensure the effective use of battery energy. Random activation can be initiated by the external artificial launch activation signal, and the nRF905 receives this signal and then activates the MCU and soil moisture sensors and sends the measurement data in time. Furthermore, before nightfall, when the MCU detects that solar energy is not sufficient to maintain the power consumption of the controller itself, the charge controller is turned off such that the power consumption of this part falls to zero. Because the wireless transceiver module and MCU have different operating level requirements, a level converter LP2981 must be used. The rationality of the photoelectric conversion element is one of the main features of this system. In this research, the main performance parameters of the polysilicon solar panels are an open circuit voltage of 11 V, a short-circuit current of 37 mA, a working voltage of 9 V, and an operating current of 22 mA. We selected the nickel-metal hydride battery pack with an output voltage of 6 V and a discharge capacity of 2,100 mAh.

During this experiment, the measurement interval was every 15min. As presented in Fig 2, the executing sequence of the system in the operating mode took 12s for a sampling process. According to the current consumption of each component shown in Table 1 and the executing sequence in Fig 2, the average current consumption of the system was equal to 3.2mA, in which 3mA resulted from the self-consumptions of DC-regulator (1mA) and recharge control unit (2mA). Since only 0.2mA comes from the current consumption of sampling process, which means 93.75% of total current consumption was due to the DC-regulator and recharge control unit.

Table 3. Power consumption of system.

|                             | working voltage/V | working current/mA              |
|-----------------------------|-------------------|---------------------------------|
| Micro-controller            | 3.3               | 0.01                            |
| Soil moisture sensor        | 6.0               | 25                              |
| FLASH                       | 3.3               | 15(write), 4(read)              |
| DC-regulator                | 6.0               | 1                               |
| Wireless transceiver module | 3.3               | 12.5 (emitting), 11 (receiving) |
| Recharge control unit       | 6.0               | 2 (self-consumption)            |

<https://doi.org/10.1371/journal.pone.0184125.t003>

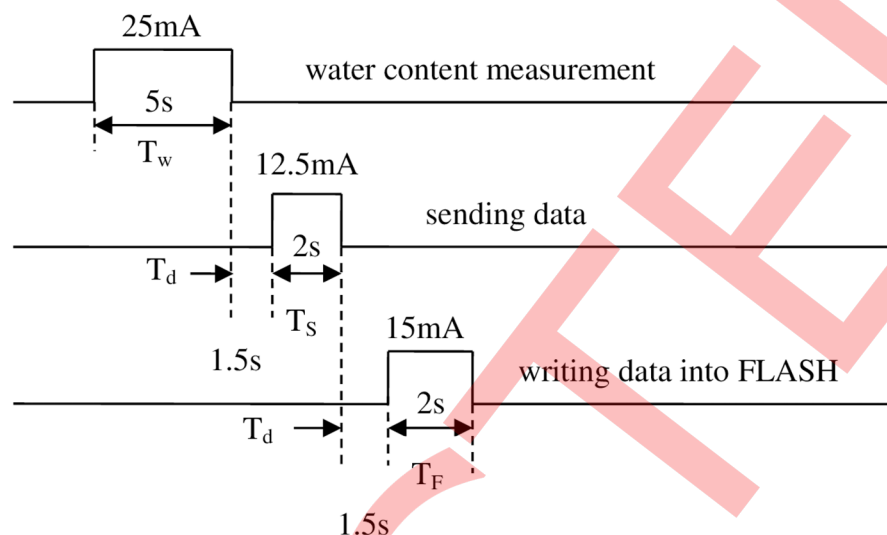

$$T_o = T_w + 2 T_d + T_s + T_F = 12s$$

**Fig 2. Layout executing sequence of a sampling process in the sensor system.**  $T_o$  = overall operating time,  $T_w$  = time to measure soil water content,  $T_d$  = delay time in between,  $T_s$  = time to send data,  $T_F$  = time to write data into FLASH.

<https://doi.org/10.1371/journal.pone.0184125.g002>

## 2.2 Soil moisture sensor

Fig 1 shows two electrodes (a metallic ring and tip) of a capacitor that was embedded at the bottom of the supporting rod. The soil particles surrounding the electrodes created a dielectric material of the fringe-capacitance sensor. A segment of coaxial line connected the electrodes to the high-frequency oscillator (100MHz) through the center of the rod. The principle of operation of the Frequency Domain capacitance probe relies on the fact that the dielectric constant between water and air differs by a factor of 80. Thus the presence of water in the soil between the probe plates produces a highly significant change in its capacitance, the higher the water concentration, the higher the capacitance. Therefore the capacitance or dielectric constant of soil could be measured, and converted into VSWC via a specific calibration. As the probe is electrically insulated, there is no direct current flow within the soil, and thus the conductive effect of ion based salts in the soil is minimized. However different soil types can be expected to display different properties[31]. We adopted the FD-based impedance measurement method in this research. Fig 3 shows a schematic of the principle of the soil moisture sensor.

In Fig 3, the field effect of a soil moisture sensor is shown as the edge effect of the electric field distribution. The high-frequency impedance  $Z_p$  of the electrode is a function of soil moisture near the field. Although the impedance detection circuit cannot be embedded in the support bar, according to Eq (1) for transmission line theory via coaxial line impedance mapping, a slight change in the impedance  $Z_p$  can still be transmitted to the detection circuit.

$$Z_T(L) = Z_C \frac{Z_p + jZ_C \tan \frac{2\pi f}{c} \sqrt{\epsilon} L}{Z_C + jZ_p \tan \frac{2\pi f}{c} \sqrt{\epsilon} L} \quad (1)$$

where  $Z_T$  is the transform impedance of the transmission line;  $Z_C$  is the characteristic impedance of the transmission line, which depends on the structure of the transmission line;  $f$  is the

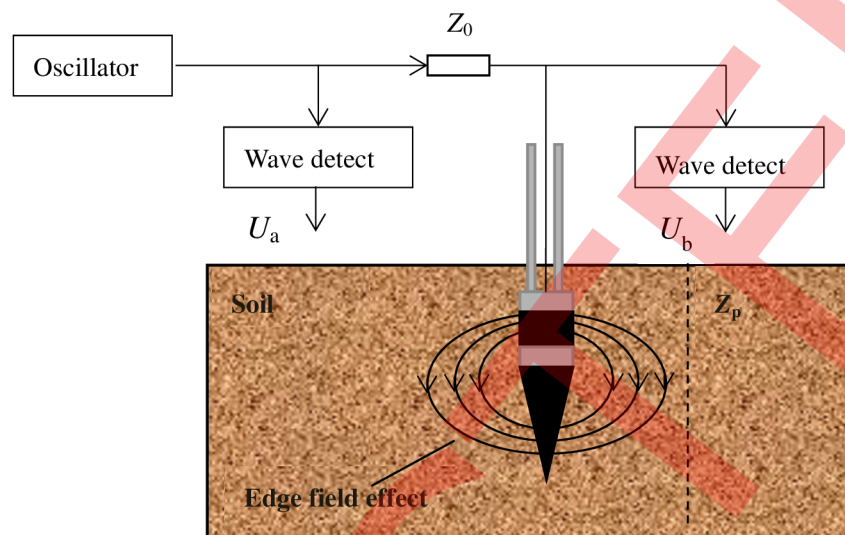

**Fig 3. Schematic diagram of the soil water content sensor.**

<https://doi.org/10.1371/journal.pone.0184125.g003>

operating frequency of the sensor;  $\epsilon$  is the relative permittivity of the insulating material in the coaxial line;  $L$  is the length of the coaxial line; and  $C = 3 \times 10^8$  m/s, which is electromagnetic wave propagation velocity in vacuum. Therefore, assuming that

$$L \frac{2\pi f}{C} \sqrt{\epsilon} = \pi \quad (2)$$

which is

$$L = \frac{C}{2f\sqrt{\epsilon}} = \frac{\lambda}{2\sqrt{\epsilon}} \quad (3)$$

then we can conclude that

$$Z_T \left( \frac{\lambda}{2\sqrt{\epsilon}} \right) = Z_p \quad (4)$$

Eq (4) shows that fidelity mapping of the impedance can be achieved when the length of coaxial line  $L$  satisfies Eq (4). Furthermore, from Fig 2,

$$Z_p = \frac{U_b}{U_a - U_b} Z_0 \quad (5)$$

where  $Z_0$  is the circuit matching impedance. Eq (5) indicates that  $Z_p$  is measurable, it is still necessary to calibrate the sensor with soil samples of different water contents to obtain the quantitative relationship between  $Z_p$  and the volumetric water content.

In this study, the geometrical structure and dimension of both electrodes approximated to the design of the combined penetrometer. Because this sensor had a rapid response (a fraction of 1s) immediately after electrical power switched on, the operating duration was chosen within 5s (Fig 4) for a reliable measurement.



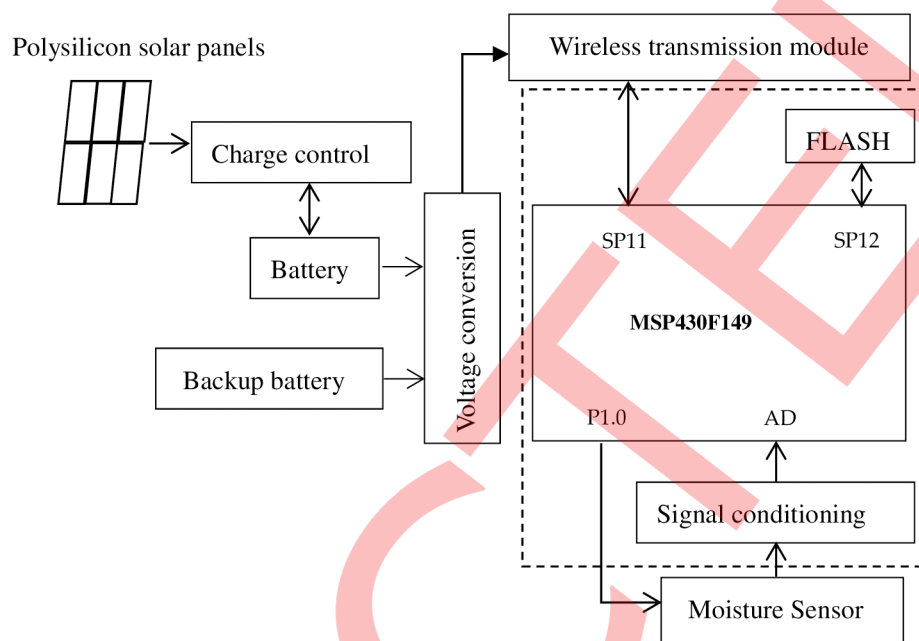

**Fig 4. Schematic diagram of data acquisition and wireless transmission.**

<https://doi.org/10.1371/journal.pone.0184125.g004>

## 2.3 Information collection and wireless data transmission

The moisture sensor information acquisition unit is indicated by the dashed box section in Fig 4. The core chip is a TI MSP430F149 microcontroller. The microcontroller was chosen not only because it contains hardware resources (including 2KRAM, 12-bit A/D) that are able to meet the monitoring requirements of the sensor but also because it works in different modes corresponding to the desired ultra-low power operation (0.1–400  $\mu$ A). Fig 4 shows that the moisture electrode signals are converted into digital signals by A/D; then, the digital signals are sent to the wireless transmission module nRF905 through the SP11 interface. The system is equipped with a dedicated internal backup battery to avoid data loss caused by solar battery failure. When the microcontroller detects a shortage of solar energy, it can enable the backup battery.

We considered power consumption and transmission distance when selecting a wireless transmission module. The operating level of nRF905 is 1.9–3.3 V. The operating frequency of the transmit/receive module can be selected from 433, 868, or 915 MHz. The wireless transmission module can complete the processing header and cyclic redundancy check code automatically, relying on on-chip hardware to achieve Manchester encoding/decoding. The maximum transfer rate is 100 kbps, and the maximum data transfer is 32 bytes at a time. Under an output power of -10 dBm, the current consumption is 11 mA when transmitting data, the current consumption is 12.5 mA when receiving data and the standby state is only 2  $\mu$ A. According to the technical manual of the module, its effective distance for wireless transmission could reach 100 m for an output power of -10 dBm.

## 3. Results and conclusions

### 3.1 Calibration equation of water content sensor

Soil samples from the field were used for a site-specific calibration under laboratory conditions, prior to the field experiment, to ensure accurate measurements. To wirelessly collect

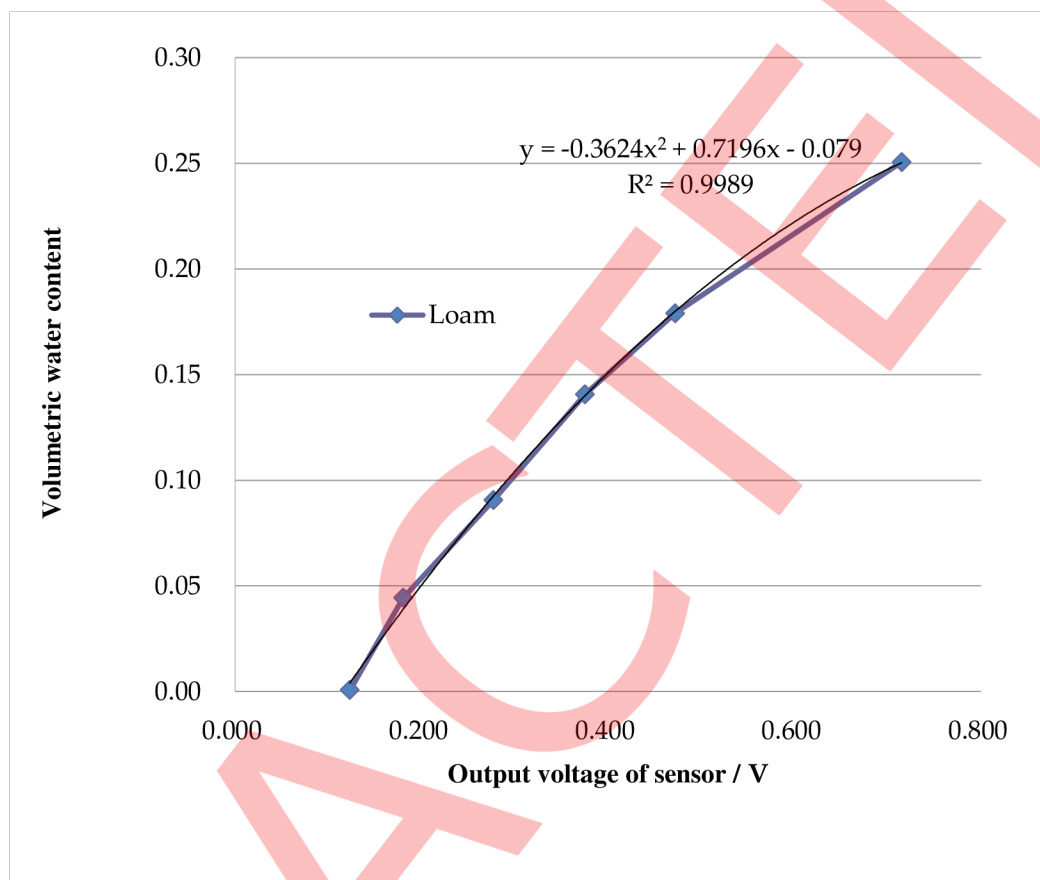

**Fig 5. Calibration results of the soil water content sensor.**

<https://doi.org/10.1371/journal.pone.0184125.g005>

data in the field, a central data-logger was set up for point to multi-point communication at a frequency bandwidth of 433.05–434.79MHz. After receiving the data from sensor, the central data-logger then transferred a data package to a PC via a standard USB port.

Fig 5 shows that the calibration results under the laboratory conditions fitted a quadratic equation ( $R^2 = 0.9989$ ) between the output of the fringe-capacitance sensor and VSWC ranging from dry to saturation (approximately 40%). This calibration outcome is closely agreed to that of the dielectric sensor that was integrated into a penetration rod[32].

### 3.2 Conclusions

The main purpose of the experiment was to test the feasibility of using this “plug-and-play” soil moisture sensor with a long-term solar power supply in the farmland environment. By interpreting the acquired data it is beneficial to better understand soil physical properties in the field and to manage the crop’s growing process for resource conservation. On the other hand, from the experiment overcomes related the solar panel size to the energy consumption, it is possible for the sensor to be miniaturized in physical dimension. The experiment results indicate that when sunlight is sufficient in Henan Province, the battery requires two days to fully charge in summer and 3 to 4 days to fully charge in winter. When the battery is fully charged, it can operate for 30 to 40 days continuously even after dynamic power is no longer added. Thus, we believe that this design is successful and can realize a “wireless” mode of soil



moisture sensors for farm environments. Second, the experimental results show that the effective radius of the wireless data transmission is approximately 100 m, which lays a technical foundation for further research of wireless mesh water monitoring about large-area farmlands. Third, because this sensor can be inserted into different soil depths and provide real-time information about moisture distribution of different soil layers, it can be applied to various farmland irrigation automation systems. Thus, this sensor can be further developed as a node of wireless network at a field scale or be utilized individually in greenhouse.

## Supporting information

**S1 File. Basic datas of Fig 5.**  
(XLSX)

## Acknowledgments

We wish to thank the financial supports of the Central Public-interest Scientific Institution Basal Research Fund (Farmland Irrigation Research Institute, CAAS) (FIRI2016-25) and Science and Technology Innovation Project of The Chinese Academy of Agricultural Sciences.

## Author Contributions

**Conceptualization:** Mingliang Jiang, Mouchao Lv, Guoliang Zhai.

**Data curation:** Zhong Deng.

**Formal analysis:** Mingliang Jiang, Zhong Deng.

**Funding acquisition:** Mouchao Lv, Guoliang Zhai.

**Investigation:** Mingliang Jiang.

**Methodology:** Mingliang Jiang.

**Project administration:** Mouchao Lv.

**Resources:** Mingliang Jiang.

**Software:** Mingliang Jiang, Zhong Deng.

**Supervision:** Mouchao Lv, Guoliang Zhai.

**Writing – original draft:** Mingliang Jiang.

**Writing – review & editing:** Mingliang Jiang, Zhong Deng, Guoliang Zhai.

## References

1. Ojha T., Misra S., Raghuwanshi N.S.. Wireless sensor networks for agriculture: the state-of-the-art in practice and future challenges. *Comput. Electron. Agric.* 2015; 118: 66–84.
2. Navarro-Hellin H., Torres-Sanchez R., Soto-Valles F., Albaladejo-Perez C., Lopez-Riquelme J.A., Domingo-Miguel R.. A wireless sensors architecture for efficient irrigation water management. *Agric. Water Manage.* 2015; 151: 64–74.
3. Tarange P H, Mevekari R G, Shinde P A. Web based automatic irrigation system using wireless sensor network and embedded Linux board[C]//Circuit, Power and Computing Technologies (ICCPCT), 2015 International Conference on. IEEE, 2015: 1–5.
4. Oates M. J., Ramadan K., Molina-Martínez J. M., Ruiz-Canales A. Automatic fault detection in a low cost frequency domain (capacitance based) soil moisture sensor. *Agric. Water Manage.* 2017; 183:41–48.
5. Jaria F., Madramootoo C. A. Thresholds for irrigation management of processing tomatoes using soil moisture sensors in Southwestern Ontario. *Transactions of the ASABE.* 2012; 56(1): 155–166.

6. Lehmann P., Gambazzi F., Suski B., Baron L., Askarinejad A., Springman S.M., et al. Evolution of soil wetting patterns preceding a hydrologically induced landslide inferred from electrical resistivity survey and point measurements of volumetric water content and pore water pressure. *Water Resour. Res.* 2014; 49 (12): 7992–8004.
7. Pakparvar M., Cornelis W., Gabriels D., Mansouri Z., Kowsar S. A. Enhancing modelled water content by dielectric permittivity in stony soils. *Soil Research.* 2016; 54(3): 360–370.
8. Wang X., Zhou B., Sun X., Yue Y., Ma W., Zhao M. Soil tillage management affects maize grain yield by regulating spatial distribution coordination of roots, soil moisture and nitrogen status. *PloS one.* 2015; 10(6): e0129231. <https://doi.org/10.1371/journal.pone.0129231> PMID: 26098548
9. Baghdadi N., Dubois-Fernandez P., Dupuis X., Zribi M., Sensitivity of main polarimetric parameters of multifrequency polarimetric SAR data to soil moisture and surface roughness over bare agricultural soils. *IEEE Geosci. Remote Sens. Lett.* 2014; 10 (4): 731–735.
10. Song L., Zhu J., Yan Q., Kang H. Estimation of groundwater levels with vertical electrical sounding in the semiarid area of South Keerqin sandy aquifer, China. *Journal of Applied Geophysics.* 2012; 83: 11–18.
11. Mosuro G.O., Bayewu O.O., Oloruntola M.O.. Application of vertical electric soundings for foundation investigation in a basement complex terrain: a case study of Ijebu Igbo, Southwestern Nigeria. In: *Near-Surface Geophysics and Environment Protection.*, 2012. pp.29–34.
12. Al-Asadi R.A., Mouazen A.M. Combining frequency domain reflectometry and visible and near infrared spectroscopy for assessment of soil bulk density. *Soil Tillage Res.* 2014; 135: 60–70.
13. Janik G., Wolski K., Daniel A., Albert M., Skierucha W., Wilczek A., et al. TDR Technique for Estimating the Intensity of Evapotranspiration of Turfgrasses. *The Scientific World Journal*, 2015.
14. Huang J., Scudiero E., Choo H., Corwin D. L., Triantafyllis J. Mapping soil moisture across an irrigated field using electromagnetic conductivity imaging. *Agricultural Water Management.* 2016; 163: 285–294.
15. Austin R.S., Rhoades J.D. A compact low cost circuit for reading four-electrode salinity sensors. *J. Soil Sci. Soc. Am.* 1979; 43:808–809.
16. Toll D. G., Hassan A. *Data Acquisition and Control Software for Automated Resistivity Measurements.* Information Technology in Geo-Engineering. 2014.
17. Rashid B., Rehmani M. H. Applications of wireless sensor networks for urban areas: a survey. *Journal of Network and Computer Applications.* 2016; 60:192–219.
18. Rehmani M H. Emerging Communication Technologies Based on Wireless Sensor Networks: Current Research and Future Applications[J]. *Anatomical Record*, 2016; 112(2):195–215.
19. Vaz C. M., Jones S., Meding M., Tuller M. Evaluation of standard calibration functions for eight electromagnetic soil moisture sensors. *Vadose Zone Journal.* 2013; 12(2).
20. Ma Y., Feng S., Song X. A root zone model for estimating soil water balance and crop yield responses to deficit irrigation in the North China Plain. *Agricultural water management*, 2013; 127:13–24.
21. Whalley W.R., Clark L.J., Take W.A., Bird R.A., Leech P.K., Cope R.E., et al. A porous-matrix sensor to measure the metric potential of soil water in the field. *European Journal of Soil Science.* 2007; 58:18–23.
22. Topp G.C., Annan J.L., Davis A.P. Electromagnetic determination of soil water content: measurements in coaxial transmission lines. *Water Resources Research.* 1980; 16:574–582.
23. Herkelrath W. N., Hamburg S. P., Murphy F. Automatic, real-time monitoring of soil moisture in a remote field area with time domain reflectometry. *Water Resources Research.* 1991; 27(5): 857–864.
24. Gaskin G.C., Miller J.D. Measurement of soil water content using a simplified impedance measuring technique. *Agricultural Engineering Research.* 1996; 63: 153–216.
25. Robinson D. A., Campbell C. S., Hopmans J. W., Hornbuckle B. K., Jones S. B., Knight R., et al. Soil moisture measurement for ecological and hydrological watershed-scale observatories: A review. *Vadose Zone Journal.* 2008; 7(1): 358–389.
26. Avanzi F., Caruso M., Jommi C., De Michele C., Ghezzi A. Continuous-time monitoring of liquid water content in snowpacks using capacitance probes: A preliminary feasibility study. *Advances in Water Resources.* 2014; 68:32–41.
27. Vaz C.M.P., Hopmans J.W. Simultaneous measurement of soil penetration resistance and water content with a combined penetrometer-TDR moisture probe. *Soil Science Society American Journal.* 2001; 65:4–12.
28. Naderi-Boldaji M., Sharifi A., Jamshidi B., Younesi-Alamouti M., Minaee S. A dielectric-based combined horizontal sensor for on-the-go measurement of soil water content and mechanical resistance. *Sensors and Actuators A: Physical.* 2011; 171(2): 131–137.

29. Sardini E., Serpelloni M. Self-powered wireless sensor for air temperature and velocity measurements with energy harvesting capability. *IEEE Transactions on Instrumentation and Measurement*.2011; 60 (5): 1838–1844.
30. Akhtar F., Rehmani M. H. Energy replenishment using renewable and traditional energy resources for sustainable wireless sensor networks: A review. *Renewable and Sustainable Energy Reviews*. 2015; 45:769–784.
31. Thompson R. B., Gallardo M., Valdez L. C., Fernández M. D. Determination of lower limits for irrigation management using in situ assessments of apparent crop water uptake made with volumetric soil water content sensors. *Agricultural water management*,2007; 92(1): 13–28.
32. Zink A., Fleige H., Horn R. Verification of harmful subsoil compaction in loess soils. *Soil and Tillage Research*.2011; 114(2): 127–134.
